# Supplementary material for: School Lunch Programs and Nutritional Education Improve Knowledge, Attitudes, and Practices and Reduce the Prevalence of Anemia: A Pre-Post Intervention Study in an Indonesian Islamic Boarding School
Source: MDPI journal article supplement (doi:10.3390/nu15041055), 2023-02-20
Supplement: s1 [file s1]

## Supplementary Materials

Table S1. School Lunch Meal Plan of 14 Menu (Cycles).

| Cycle | Breakfast                                                                                                                                 | Lunch                                                                                                                                                                                                               | Dinner                                                                                                                                                                             |
|-------|-------------------------------------------------------------------------------------------------------------------------------------------|---------------------------------------------------------------------------------------------------------------------------------------------------------------------------------------------------------------------|------------------------------------------------------------------------------------------------------------------------------------------------------------------------------------|
| 1     | <ul style="list-style-type: none"> <li>Steamed rice</li> <li>Boiled vegetables and fried tofu with peanut sauce (<i>Pecel</i>)</li> </ul> | <ul style="list-style-type: none"> <li>Steamed rice</li> <li>Fried mackerel</li> <li>Boiled mix vegetables with grated coconut (<i>Urap</i>)</li> <li>Banana</li> </ul>                                             | <ul style="list-style-type: none"> <li>Steamed rice</li> <li>Tofu and oyster mushroom soup</li> </ul>                                                                              |
| 2     | <ul style="list-style-type: none"> <li>Steamed rice</li> <li>Mix long bean and tempeh stir fry</li> </ul>                                 | <ul style="list-style-type: none"> <li>Steamed rice</li> <li>Fried tofu with sweet and sour sauce</li> <li>Sprouts stir fry with mushroom</li> <li>Papaya</li> </ul>                                                | <ul style="list-style-type: none"> <li>Steamed rice</li> <li>Vegetable and tempeh cooked with coconut milk (<i>Lodeh</i>)</li> </ul>                                               |
| 3     | <ul style="list-style-type: none"> <li>Steamed rice</li> <li>Mix green bean and tofu stir fry</li> </ul>                                  | <ul style="list-style-type: none"> <li>Steamed rice</li> <li>Fried eggs</li> <li>Boiled Mix vegetables with peanut sauce (<i>Pecel</i>)</li> <li>Snake fruit</li> </ul>                                             | <ul style="list-style-type: none"> <li>Steamed rice</li> <li>Fried tofu</li> <li>Chayote stir fry with corn</li> </ul>                                                             |
| 4     | <ul style="list-style-type: none"> <li>Steamed rice</li> <li>Vegetable and tempeh cooked with coconut milk (<i>Lodeh</i>)</li> </ul>      | <ul style="list-style-type: none"> <li>Steamed rice</li> <li>Fried tempeh coated with wheat flour (<i>Tempe mendoan</i>)</li> <li>Mix vegetables in tamarind soup (<i>Sayur asem</i>)</li> <li>Orange</li> </ul>    | <ul style="list-style-type: none"> <li>Steamed rice</li> <li>Mix vegetables soup</li> </ul>                                                                                        |
| 5     | <ul style="list-style-type: none"> <li>Steamed rice</li> <li>Fried tempeh</li> <li>Pak coi stir fry</li> </ul>                            | <ul style="list-style-type: none"> <li>Steamed rice</li> <li>Fried chicken</li> <li>Cassava leave cooked with coconut milk (<i>Gulai daun singkong</i>)</li> <li>Water melon</li> </ul>                             | <ul style="list-style-type: none"> <li>Steamed rice</li> <li>Tempeh cooked with palm sugar sauce (<i>Tempe bacem</i>)</li> <li>Water Spinach (<i>Kangkung</i>) stir fry</li> </ul> |
| 6     | <ul style="list-style-type: none"> <li>Fried rice (made from steamed rice, vegetable and seasoning)</li> <li>Fried egg</li> </ul>         | <ul style="list-style-type: none"> <li>Steamed rice</li> <li>Chicken liver cooked with chili sauce and coconut milk (<i>Rendang hati ayam</i>)</li> <li>Spinach soup with corn</li> <li>Melon</li> </ul>            | <ul style="list-style-type: none"> <li>Steamed rice</li> <li>Chayote and tempeh with curry soup</li> </ul>                                                                         |
| 7     | <ul style="list-style-type: none"> <li>Steamed rice</li> <li>Stir fry tempeh with soy sauce</li> <li>Chinese cabbage stir fry</li> </ul>  | <ul style="list-style-type: none"> <li>Steamed rice</li> <li>Mix green bean and tofu stir fry</li> <li>Banana</li> </ul>                                                                                            | <ul style="list-style-type: none"> <li>Steamed rice</li> <li>Fried tofu</li> <li>Spinach soup</li> </ul>                                                                           |
| 8     | <ul style="list-style-type: none"> <li>Steamed rice</li> <li>Tofu and oyster mushroom soup</li> </ul>                                     | <ul style="list-style-type: none"> <li>Steamed rice</li> <li>Mackerel with chili sauce (<i>Tongkol balado</i>)</li> <li>Vegetable and tempeh cooked with coconut milk (<i>Lodeh</i>)</li> <li>Mangosteen</li> </ul> | <ul style="list-style-type: none"> <li>Steamed rice</li> <li>Fried tempeh</li> <li>Mix vegetables in tamarind soup (<i>Sayur asem</i>)</li> </ul>                                  |
| 9     | <ul style="list-style-type: none"> <li>Steamed rice</li> </ul>                                                                            | <ul style="list-style-type: none"> <li>Steamed rice</li> </ul>                                                                                                                                                      | <ul style="list-style-type: none"> <li>Steamed rice</li> </ul>                                                                                                                     |

|    |                                                                                                                                                         |                                                                                                                                                                                                      |                                                                                                                                                 |
|----|---------------------------------------------------------------------------------------------------------------------------------------------------------|------------------------------------------------------------------------------------------------------------------------------------------------------------------------------------------------------|-------------------------------------------------------------------------------------------------------------------------------------------------|
|    | <ul style="list-style-type: none"> <li>Fried tempeh</li> <li>Mix vegetable stir fry (<i>Capcay</i>)</li> </ul>                                          | <ul style="list-style-type: none"> <li>Chicken soup with vegetable</li> <li>Rambutan</li> </ul>                                                                                                      | <ul style="list-style-type: none"> <li>Chayote and boiled egg with curry soup</li> </ul>                                                        |
| 10 | <ul style="list-style-type: none"> <li>Steamed rice</li> <li>Fried tofu</li> <li>Pak coi stir fry</li> </ul>                                            | <ul style="list-style-type: none"> <li>Steamed rice</li> <li>Fried eggs with sweet and sour sauce</li> <li>Water Spinach (<i>Kangkung</i>) stir fry</li> <li>Orange</li> </ul>                       | <ul style="list-style-type: none"> <li>Steamed rice</li> <li>Fried tempeh</li> <li>Oyster mushroom soup with carrot</li> </ul>                  |
| 11 | <ul style="list-style-type: none"> <li>Steamed rice</li> <li>Fried tempeh</li> <li>Jack fruit cooked with coconut milk (<i>Gulai nangka</i>)</li> </ul> | <ul style="list-style-type: none"> <li>Steamed rice</li> <li>Tempeh cooked with palm sugar sauce (<i>Tempe bacem</i>)</li> <li>Chinese okra/Luffa soup</li> <li>Papaya</li> </ul>                    | <ul style="list-style-type: none"> <li>Steamed rice</li> <li>Fried Tofu</li> <li>Mix vegetables in tamarind soup (<i>Sayur asem</i>)</li> </ul> |
| 12 | <ul style="list-style-type: none"> <li>Steamed rice</li> <li>Sprouts stir fry with tofu</li> </ul>                                                      | <ul style="list-style-type: none"> <li>Steamed rice</li> <li>Fried chicken with oyster sauce</li> <li>Mix oyster mushroom and corn stir fry</li> <li>Snake fruit</li> </ul>                          | <ul style="list-style-type: none"> <li>Steamed rice</li> <li>Fried Tempeh</li> <li>Chinese cabbage stir fry</li> </ul>                          |
| 13 | <ul style="list-style-type: none"> <li>Steamed rice</li> <li>Vegetable and tempeh cooked with coconut milk (<i>Lodeh</i>)</li> </ul>                    | <ul style="list-style-type: none"> <li>Steamed rice</li> <li>Chicken liver cooked with soy sauce (<i>Semur hati ayam</i>)</li> <li>Mix vegetable stir fry (<i>Capcay</i>)</li> <li>Banana</li> </ul> | <ul style="list-style-type: none"> <li>Steamed rice</li> <li>Chayote and tofu with curry soup</li> </ul>                                        |
| 14 | <ul style="list-style-type: none"> <li>Steamed rice</li> <li>Pak coi stir fry with tofu</li> </ul>                                                      | <ul style="list-style-type: none"> <li>Steamed rice</li> <li>Tempeh cooked with coconut milk (<i>Opor tempe</i>)</li> <li>Green bean stir fry</li> <li>Orange</li> </ul>                             | <ul style="list-style-type: none"> <li>Steamed rice</li> <li>Fried tempeh</li> <li>Spinach soup with corn</li> </ul>                            |
